# Supplementary material
Source: PubMed Central journal article supplement (PMC5885847)
Supplement: jamapediatr-172-257-s001.pdf [file jamapediatr-172-257-s001.pdf]

## Supplementary Online Content

Alobaidi R, Morgan C, Basu RK, et al. Association between fluid balance and outcomes in critically ill children: a systematic review and meta-analysis. *JAMA Pediatr*. Published online January 22, 2018. doi: 10.1001/jamapediatrics.2017.4540

**eTable 1.** Search Strategy

**eTable 2.** List of Conference Proceedings Searched

**eTable 3.** Newcastle-Ottawa Quality Assessment Scale

**eTable 4.** Fluid Balance Assessment Methods

**eTable 5.** Weights Used in FO Definitions

**eTable 6.** Studies Reporting Respiratory Dysfunction and Outcomes

**eTable 7.** Other Outcomes From Individual Studies

**eFigure 1.** Flow Diagram of the Study Selection Process

**eFigure 2.** Association Between FO (Categorical Exposure) and Mortality in Studies Adjusting for Severity of Illness

**eFigure 3.** Association Between Fluid Overload (Categorical Exposure) and Mortality Omitting Studies of Children Receiving CRRT

**eFigure 4.** Percent Fluid Overload (%FO) (Continuous Variable) Association With Mortality, Stratified by Assessment Period

**eFigure 5.** Percent Fluid Overload (%FO) (Continuous Variable) Association With Mortality in Studies Adjusting for Severity of Illness (Stratified by Case-Mix)

**eFigure 6.** Funnel Plot of FO Odds of Mortality (Categorical Exposure) Analysis

**eFigure 7.** Funnel Plot of Fluid Overload Percent (%FO) (Continuous Variable) Association With Mortality Analysis

**eFigure 8.** Random-Effects Meta-analysis of FO and Prolonged Mechanical Ventilation

**eFigure 9.** Random-Effects Meta-analysis of FO and Acute Kidney Injury

**eFigure 10.** Random-Effects Meta-analysis of FO and PICU Length of Stay

This supplementary material has been provided by the authors to give readers additional information about their work.

**eTable 1. Search Strategy**

| <b>Database: Epub Ahead of Print, In-Process &amp; Other Non-Indexed Citations, Ovid MEDLINE(R) Daily and Ovid MEDLINE(R) 1946 to Present</b> |                                                                                                                                                              |
|-----------------------------------------------------------------------------------------------------------------------------------------------|--------------------------------------------------------------------------------------------------------------------------------------------------------------|
| 1. Acute Kidney Injury/                                                                                                                       | 42. (respiratory care adj (department* or unit* or ward or wards)).tw,kf.                                                                                    |
| 2. Acute Lung Injury/                                                                                                                         | 43. respiratory failure.tw,kf.                                                                                                                               |
| 3. exp Cardiac Surgical Procedures/                                                                                                           | 44. RRT.tw,kf.                                                                                                                                               |
| 4. exp Critical Care/                                                                                                                         | 45. (sepsis or septic*).tw,kf. 46. transplant*.tw,kf.                                                                                                        |
| 5. Critical Illness/                                                                                                                          | 47. or/1-46                                                                                                                                                  |
| 6. Heart Defects, Congenital/su                                                                                                               | 48. Body Fluids/                                                                                                                                             |
| 7. exp Intensive Care Units/                                                                                                                  | 49. Diuretics/                                                                                                                                               |
| 8. Kidney/in                                                                                                                                  | 50. Fluid Therapy/                                                                                                                                           |
| 9. Multiple Organ Failure/                                                                                                                    | 51. exp Solutions/ad, ae                                                                                                                                     |
| 10. Multiple Trauma/                                                                                                                          | 52. Water-Electrolyte Imbalance/                                                                                                                             |
| 11. exp Organ Transplantation/                                                                                                                | 53. Water Intoxication/                                                                                                                                      |
| 12. Postoperative Complications/                                                                                                              | 54. diuretic*.tw,kf.                                                                                                                                         |
| 13. exp Renal Replacement Therapy/                                                                                                            | 55. (fluid* adj1 (accumulat* or administ* or balance or excess* or imbalance or manag* or over load* or overload* or retain* or retention or remov*)).tw,kf. |
| 14. Respiration, Artificial/                                                                                                                  | 56. or/48-55                                                                                                                                                 |
| 15. Respiratory Insufficiency/                                                                                                                | 57. exp Adolescent/                                                                                                                                          |
| 16. exp Sepsis/                                                                                                                               | 58. exp Child/                                                                                                                                               |
| 17. Transplant Recipients/                                                                                                                    | 59. exp Infant/                                                                                                                                              |
| 18. Transplantation/                                                                                                                          | 60. exp Infant, Newborn Diseases/                                                                                                                            |
| 19. Transplants/                                                                                                                              | 61. exp Infant, Premature, Diseases/                                                                                                                         |
| 20. (acute kidney adj (failure or injur* or insufficien*)).tw,kf.                                                                             | 62. exp Minors/                                                                                                                                              |
| 21. acute lung injur*.tw,kf.                                                                                                                  | 63. Neonatology/                                                                                                                                             |
| 22. (acute renal adj (failure or injur* or insufficien*)).tw,kf.                                                                              | 64. exp Pediatrics/                                                                                                                                          |
| 23. (AKI or ALI).tw,kf.                                                                                                                       | 65. Perinatal Care/                                                                                                                                          |
| 24. ((artificial* or mechanic*) adj (respirat* or ventilat*)).tw,kf.                                                                          | 66. Perinatology/                                                                                                                                            |
| 25. ((cardiac or heart) adj surg*).tw,kf.                                                                                                     | 67. Postnatal Care/                                                                                                                                          |
| 26. (coronary care adj (department* or unit* or ward or wards)).tw,kf.                                                                        | 68. Premature Birth/                                                                                                                                         |
| 27. critical care.tw,kf,jw.                                                                                                                   | 69. exp Puberty/                                                                                                                                             |
| 28. (critical* adj2 (department* or unit* or ward or wards)).tw,kf.                                                                           | 70. (baby* or babies or infant* or infancy or newborn* or newborn*).tw,kf.                                                                                   |
| 29. critical* ill*.tw,kf.                                                                                                                     | 71. (boy* or girl* or teen*).tw,kf.                                                                                                                          |
| 30. CRRT.tw,kf.                                                                                                                               | 72. (child* or kid or kids or pre school* or preschool* or school age* or schoolchild* or toddler*).tw,kf.                                                   |
| 31. CVVH.tw,kf.                                                                                                                               | 73. (ELBW* or VLBW*).tw,kf.                                                                                                                                  |
| 32. (haemo filtrat* or haemofiltrat* or hemo filtrat* or hemofiltrat*).tw,kf.                                                                 | 74. low birth weight.tw,kf.                                                                                                                                  |
| 33. intensive care*.tw,kf,jw.                                                                                                                 | 75. minors*.tw,kf.                                                                                                                                           |
| 34. (intensive adj2 (department* or unit* or ward or wards)).tw,kf.                                                                           | 76. (neonat* or perinat* or postnat*).tw,kf.                                                                                                                 |
| 35. intensivist*.tw,kf.                                                                                                                       | 77. (paediatric* or peadiatric* or pediatric*).tw,kf,jw.                                                                                                     |
| 36. (ICU* or NICU* or PICU* or SICU*).tw,kf.                                                                                                  | 78. (prepubescen* or pubescen* or pubert*).tw,kf.                                                                                                            |
| 37. (multi* organ adj (dysfunction* or dis function* or dysfunction* or dys function* or failure*)).tw,kf.                                    | 79. small for gestational age.tw,kf.                                                                                                                         |
| 38. (multi* system adj (dysfunction* or dis function* or dysfunction* or dys function* or failure*)).tw,kf.                                   | 80. or/57-79                                                                                                                                                 |
| 39. (polytrauma* or trauma*).tw,kf.                                                                                                           | 81. and/47,56,80                                                                                                                                             |
| 40. (post op* or postop*).tw,kf.                                                                                                              | 82. animals/ not (animals/ and humans/)                                                                                                                      |
| 41. (renal replacement adj2 (therap* or treatm* or support*)).tw,kf.                                                                          | 83. 81 not 82                                                                                                                                                |
|                                                                                                                                               | 84. (case reports or comment or editorial or letter).pt. 85. 83 not 84                                                                                       |
|                                                                                                                                               | 86. remove duplicates from 85                                                                                                                                |

**eTable 2.** List of Conference Proceedings Searched

- The Society of Critical Care Medicine (SCCM)
- Canadian Critical Care Society
- The European Society of Intensive Care Medicine (ESICM)
- The International Symposium on Intensive Care and Emergency Medicine (ISICEM)
- The World Federation of Pediatric Intensive and Critical Care Societies
- American Society of Nephrology (ASN)
- International Society of Nephrology (ISN)
- International Symposium on AKI in Children
- International Conference on Pediatric Continuous Renal Replacement Therapy (pCRRT)

**eTable 3.** Newcastle-Ottawa Quality Assessment Scale

**1. Cohort studies**

| Newcastle-Ottawa Scale<br>(Cohort Studies) |              |                              |                                 |                           |                     |                          |                       |                                |                              |             |
|--------------------------------------------|--------------|------------------------------|---------------------------------|---------------------------|---------------------|--------------------------|-----------------------|--------------------------------|------------------------------|-------------|
|                                            |              | Selection                    |                                 |                           |                     | Comparability            | Outcome               |                                |                              | Total       |
| Author and Year                            | Study Design | Representativeness of cohort | Selection of non-exposed cohort | Ascertainment of exposure | Outcome of interest | Comparability of cohorts | Assessment of outcome | Adequate duration of follow-up | Adequate follow-up of cohort | Total Score |
| Abulebda, 2014 <sup>1</sup>                | RC           | 1*                           | A (1*)                          | A (1*)                    | A (1*)              | A (0)<br>B (1*)          | A (1*)                | A (1*)                         | A (1*)                       | 8           |
| Arikan, 2012 <sup>2</sup>                  | RC           | 1*                           | A (1*)                          | A (1*)                    | A (1*)              | A (1*)<br>B (1*)         | A (1*)                | A (1*)                         | A (1*)                       | 9           |
| Askenazi, 2013 <sup>3</sup>                | PC           | 0                            | A (1*)                          | A (1*)                    | A (1*)              | A (0)<br>B (1*)          | A (1*)                | A (1*)                         | A (1*)                       | 7           |
| Baird, 2010 <sup>4</sup>                   | RC           | 1*                           | A (1*)                          | A (1*)                    | A (1*)              | A (0)<br>B (0)           | A (1*)                | A (1*)                         | A (1*)                       | 7           |
| Boschee, 2014 <sup>5</sup>                 | RC           | 1*                           | A (1*)                          | A (1*)                    | A (1*)              | A (0)<br>B (0)           | A (1*)                | A (1*)                         | A (1*)                       | 7           |
| Chen, 2016 <sup>6</sup>                    | RC           | 1*                           | A (1*)                          | A (1*)                    | A (1*)              | A (1*)<br>B (1*)         | A (1*)                | A (1*)                         | A (1*)                       | 9           |
| Choi, 2017 <sup>7</sup>                    | RC           | 1*                           | A (1*)                          | A (1*)                    | A (1*)              | A (0)<br>B (1*)          | A (1*)                | A (1*)                         | A (1*)                       | 8           |
| De Galasso, 2016 <sup>8</sup>              | RC           | 1*                           | A (1*)                          | A (1*)                    | A (1*)              | A (1*)<br>B (1*)         | A (1*)                | A (1*)                         | A (1*)                       | 9           |
| Diaz, 2017 <sup>9</sup>                    | PC           | 1*                           | A (1*)                          | A (1*)                    | A (1*)              | A (1*)<br>B (1*)         | A (1*)                | A (1*)                         | A (1*)                       | 9           |
| Elbahlawan, 2010 <sup>10</sup>             | RC           | 0                            | A (1*)                          | A (1*)                    | A (1*)              | A (0)<br>B (0)           | A (1*)                | A (1*)                         | A (1*)                       | 6           |
| Flores, 2008 <sup>11</sup>                 | PC           | 0                            | A (1*)                          | A (1*)                    | A (1*)              | A (0)<br>B (0)           | A (1*)                | A (1*)                         | A (1*)                       | 6           |
| Flori, 2011 <sup>12</sup>                  | PC           | 1*                           | A (1*)                          | A (1*)                    | A (1*)              | A (0)<br>B (1*)          | A (1*)                | A (1*)                         | A (1*)                       | 8           |
| Foland, 2004 <sup>13</sup>                 | RC           | 1*                           | A (1*)                          | A (1*)                    | A (1*)              | A (0)<br>B (1*)          | A (1*)                | A (1*)                         | A (1*)                       | 8           |
| Gillespie, 2004 <sup>14</sup>              | RC           | 1*                           | A (1*)                          | A (1*)                    | A (1*)              | A (0)<br>B (1*)          | A (1*)                | A (1*)                         | A (1*)                       | 8           |
| Goldstein, 2005 <sup>15</sup>              | PC           | 0                            | A (1*)                          | A (1*)                    | A (1*)              | A (0)<br>B (1*)          | A (1*)                | A (1*)                         | A (1*)                       | 7           |
| Goldstein, 2001 <sup>16</sup>              | RC           | 1*                           | A (1*)                          | A (1*)                    | A (1*)              | A (0)<br>B (1*)          | A (1*)                | A (1*)                         | A (1*)                       | 8           |
| Gulla, 2015 <sup>17</sup>                  | RC           | 0                            | A (1*)                          | A (1*)                    | A (1*)              | A (0)<br>B (0)           | A (1*)                | A (1*)                         | A (1*)                       | 6           |
| Hassinger, 2014 <sup>18</sup>              | PC           | 1*                           | A (1*)                          | A (1*)                    | A (1*)              | A (1)<br>B (0)           | A (1*)                | A (1*)                         | A (1*)                       | 8           |

|                                   |    |    |        |        |        |                  |        |        |        |   |
|-----------------------------------|----|----|--------|--------|--------|------------------|--------|--------|--------|---|
| Hayes, 2009 <sup>19</sup>         | RC | 1* | A (1*) | A (1*) | A (1*) | A (1*)<br>B (1*) | A (1*) | A (1*) | A (1*) | 9 |
| Hazle, 2013 <sup>20</sup>         | PC | 0  | A (1*) | A (1*) | A (1*) | A (1)<br>B (1)   | A (1*) | A (1*) | A (1*) | 8 |
| Ingelse, 2017 <sup>21</sup>       | RC | 0  | A (1*) | A (1*) | A (1*) | A (0)<br>B (0)   | A (1*) | A (1*) | A (1*) | 6 |
| Jhang, 2014 <sup>22</sup>         | RC | 1* | A (1*) | A (1*) | A (1*) | A (0)<br>B (1*)  | A (1*) | A (1*) | A (1*) | 8 |
| Kaempfer, 2017 <sup>23</sup>      | RC | 0  | A (1*) | A (1*) | A (1*) | A (0)<br>B (0)   | A (1*) | A (1*) | A (1*) | 6 |
| Ketharanathan, 2014 <sup>24</sup> | PC | 1* | A (1*) | A (1*) | A (1*) | A (0)<br>B (0)   | A (1*) | A (1*) | A (1*) | 7 |
| Lex, 2016 <sup>25</sup>           | PC | 1* | A (1*) | A (1*) | A (1*) | A (1*)<br>B (1*) | A (1*) | A (1*) | A (1*) | 9 |
| Li, 2016 <sup>26</sup>            | PC | 1* | A (1*) | A (1*) | A (1*) | A (1*)<br>B (1*) | A (1*) | A (1*) | A (1*) | 9 |
| Lombel, 2012 <sup>27</sup>        | RC | 0  | A (1*) | A (1*) | A (1*) | A (0)<br>B (1*)  | A (1*) | A (1*) | A (1*) | 7 |
| Michael, 2004 <sup>28</sup>       | PC | 0  | A (1*) | A (1*) | A (1*) | A (0)<br>B (0)   | A (1*) | A (1*) | A (1*) | 6 |
| Modem, 2014 <sup>29</sup>         | RC | 1* | A (1*) | A (1*) | A (1*) | A (0)<br>B (1*)  | A (1*) | A (1*) | A (1*) | 8 |
| Naveda, 2016 <sup>30</sup>        | PC | 1* | A (1*) | A (1*) | A (1*) | A (1*)<br>B (1*) | A (1*) | A (1*) | A (1*) | 9 |
| Park, 2016 <sup>31</sup>          | RC | 0  | A (1*) | A (1*) | A (1*) | A (1)<br>B (0)   | A (1*) | A (1*) | A (1*) | 7 |
| Randolph, 2005 <sup>32</sup>      | PC | 1* | A (1*) | A (1*) | A (1*) | A (1*)<br>B (1*) | A (1*) | A (1*) | A (1*) | 9 |
| Sampaio, 2015 <sup>33</sup>       | RC | 1* | A (1*) | A (1*) | A (1*) | A (1*)<br>B (1*) | A (1*) | A (1*) | A (1*) | 9 |
| Seguin, 2014 <sup>34</sup>        | RC | 1* | A (1*) | A (1*) | A (1*) | A (1)<br>B (1*)  | A (1*) | A (1*) | A (1*) | 9 |
| Selewski, 2011 <sup>35</sup>      | RC | 1* | A (1*) | A (1*) | A (1*) | A (1*)<br>B (1*) | A (1*) | A (1*) | A (1*) | 9 |
| Selewski, 2012 <sup>36</sup>      | RC | 1* | A (1*) | A (1*) | A (1*) | A (1*)<br>B (1*) | A (1*) | A (1*) | A (1*) | 9 |
| Sinitsky, 2015 <sup>37</sup>      | RC | 1* | A (1*) | A (1*) | A (1*) | A (0)<br>B (1)   | A (1*) | A (1*) | A (1*) | 8 |
| Sutherland, 2010 <sup>38</sup>    | PC | 1* | A (1*) | A (1*) | A (1*) | A (0)<br>B (1*)  | A (1*) | A (1*) | A (1*) | 8 |
| Valentine, 2012 <sup>39</sup>     | RC | 1* | A (1*) | A (1*) | A (1*) | A (1*)<br>B (1*) | A (1*) | A (1*) | A (1*) | 9 |
| Vidal, 2016 <sup>40</sup>         | RC | 1* | A (1*) | A (1*) | A (1*) | A (1*)<br>B (1*) | A (1*) | A (1*) | A (1*) | 9 |

RC = retrospective cohort; PC= prospective cohort  
For comparability: A is age, B is illness severity

## 2. Case Control studies

| Newcastle-Ottawa Scale<br>(Case control studies) |                           |                             |                        |                         |                                     |                         |                               |                    |             |
|--------------------------------------------------|---------------------------|-----------------------------|------------------------|-------------------------|-------------------------------------|-------------------------|-------------------------------|--------------------|-------------|
|                                                  | Selection                 |                             |                        |                         | Comparability                       | Outcome                 |                               |                    | Total       |
| Author and Year                                  | Case definition adequate? | Representativeness of cases | Select ion of Controls | Definit ion of Controls | Comparability of cases and controls | Assess ment of exposure | Same method of ascertain ment | Non-Respo nse rate | Total Score |
| Bhask ar, 2015 <sup>41</sup>                     | 1*                        | A (1*)                      | A (1*)                 | A (1*)                  | A (1*)<br>B (1*)                    | A (1*)                  | A (1*)                        | A (1*)             | 9           |
| Hoove r, 2008 <sup>42</sup>                      | 1*                        | 0                           | A (1*)                 | A (1*)                  | A (0)<br>B (0)                      | A (1*)                  | A (1*)                        | A (1*)             | 6           |
| Sutaw an, 2016 <sup>43</sup>                     | 1*                        | A (1*)                      | A (1*)                 | A (1*)                  | A (0)<br>B (1*)                     | A (1*)                  | A (1*)                        | A (1*)             | 8           |

For comparability: A is age, B is illness severity

**eTable 4.** Fluid Balance Assessment Methods

| Main Fluid Balance Measure                         | Assessment Period                         |                            | Paper(s)                                                                                                                                                                                                                                                                                                                                                                                                                                                                        |                                                           |                          |
|----------------------------------------------------|-------------------------------------------|----------------------------|---------------------------------------------------------------------------------------------------------------------------------------------------------------------------------------------------------------------------------------------------------------------------------------------------------------------------------------------------------------------------------------------------------------------------------------------------------------------------------|-----------------------------------------------------------|--------------------------|
|                                                    | Start                                     | End                        |                                                                                                                                                                                                                                                                                                                                                                                                                                                                                 |                                                           |                          |
| Percent Fluid Overload (FO%) (intake-output based) | PICU admission                            | 24 hours                   | Chen, 2016 <sup>6</sup><br>Li, 2016 <sup>26</sup><br>Hassinger, 2014 <sup>18</sup>                                                                                                                                                                                                                                                                                                                                                                                              |                                                           |                          |
|                                                    |                                           | 48 hours                   | Sinitsky, 2015 <sup>37</sup><br>Vidal, 2016 <sup>40</sup>                                                                                                                                                                                                                                                                                                                                                                                                                       |                                                           |                          |
|                                                    |                                           | 72 hours                   | Hazle, 2013 <sup>20</sup>                                                                                                                                                                                                                                                                                                                                                                                                                                                       |                                                           |                          |
|                                                    |                                           | 7 days                     | Abulebda, 2014 <sup>1</sup><br>Bhaskar, 2015 <sup>41</sup><br>Sampaio, 2015 <sup>33</sup>                                                                                                                                                                                                                                                                                                                                                                                       |                                                           |                          |
|                                                    |                                           | 14 days                    | Arikan, 2012 <sup>2</sup>                                                                                                                                                                                                                                                                                                                                                                                                                                                       |                                                           |                          |
|                                                    |                                           | PICU discharge             | Diaz, 2017 <sup>9</sup><br>Ketharanathan, 2014 <sup>24</sup><br>Michael, 2004 <sup>28</sup><br>Naveda, 2016 <sup>30</sup><br>Sutawan, 2016 <sup>43</sup>                                                                                                                                                                                                                                                                                                                        |                                                           |                          |
|                                                    | CRRT initiation                           |                            | Askenazi, 2013 <sup>3</sup><br>Boschee, 2014 <sup>5</sup><br>de Galasso, 2016 <sup>8</sup><br>Flores, 2008 <sup>11</sup><br>Gillespie, 2004 <sup>14</sup><br>Goldstein, 2001 <sup>16</sup><br>Goldstein, 2005 <sup>15</sup><br>Gulla, 2015 <sup>17</sup><br>Hayes, 2009 <sup>19</sup><br>Jhang, 2014 <sup>22</sup><br>Kaempfen, 2017 <sup>23</sup><br>Lombel, 2012 <sup>27</sup><br>Modem, 2014 <sup>29</sup><br>Selewski, 2011 <sup>35</sup><br>Sutherland, 2010 <sup>38</sup> |                                                           |                          |
|                                                    |                                           |                            | 24 hours before CRRT initiation                                                                                                                                                                                                                                                                                                                                                                                                                                                 | Elbahlawan, 2010 <sup>10</sup><br>Choi, 2017 <sup>7</sup> |                          |
|                                                    |                                           |                            | 7 days before CRRT initiation                                                                                                                                                                                                                                                                                                                                                                                                                                                   | Baird, 2010 <sup>4</sup><br>Foland, 2004 <sup>13</sup>    |                          |
|                                                    |                                           |                            | Intra-operative                                                                                                                                                                                                                                                                                                                                                                                                                                                                 | 48 hours                                                  | Lex, 2016 <sup>25</sup>  |
|                                                    |                                           |                            |                                                                                                                                                                                                                                                                                                                                                                                                                                                                                 | 72 hours                                                  | Park, 2016 <sup>31</sup> |
|                                                    | PICU discharge                            | Seguin, 2014 <sup>34</sup> |                                                                                                                                                                                                                                                                                                                                                                                                                                                                                 |                                                           |                          |
|                                                    | Percent Fluid Overload FO% (weight based) | PICU admission             | 7 days                                                                                                                                                                                                                                                                                                                                                                                                                                                                          | Hazle, 2013 <sup>20</sup>                                 |                          |
| CRRT initiation                                    |                                           |                            | Lombel, 2012 <sup>27</sup><br>Selewski, 2011 <sup>35</sup><br>Selewski, 2012 <sup>36</sup>                                                                                                                                                                                                                                                                                                                                                                                      |                                                           |                          |
| Net Fluid Balance (ml/kg)                          | PICU admission                            | 7 days                     | Valentine, 2012 <sup>39</sup>                                                                                                                                                                                                                                                                                                                                                                                                                                                   |                                                           |                          |
|                                                    |                                           | PICU discharge             | Ingelse, 2017 <sup>21</sup>                                                                                                                                                                                                                                                                                                                                                                                                                                                     |                                                           |                          |
|                                                    | Intubation                                | Extubation                 | Randolph, 2005 <sup>32</sup>                                                                                                                                                                                                                                                                                                                                                                                                                                                    |                                                           |                          |
|                                                    | Onset of ALI                              | 72 hours post ALI          | Flori, 2011 <sup>12</sup>                                                                                                                                                                                                                                                                                                                                                                                                                                                       |                                                           |                          |
| ECMO start                                         | ECMO end                                  | Hoover, 2008 <sup>42</sup> |                                                                                                                                                                                                                                                                                                                                                                                                                                                                                 |                                                           |                          |
| Net Fluid Balance (L/m <sup>2</sup> )              | PICU admission                            | 7 days                     | Willson, 2013 <sup>44</sup>                                                                                                                                                                                                                                                                                                                                                                                                                                                     |                                                           |                          |

**eTable 5. Weights Used in FO Definitions**

| <b>Weight used</b>                                                                                      | <b>Paper (s)</b>                                                                                                                                                                                                                                                                                                                                                                                                                                                                                                                                                                                                                                                                             |
|---------------------------------------------------------------------------------------------------------|----------------------------------------------------------------------------------------------------------------------------------------------------------------------------------------------------------------------------------------------------------------------------------------------------------------------------------------------------------------------------------------------------------------------------------------------------------------------------------------------------------------------------------------------------------------------------------------------------------------------------------------------------------------------------------------------|
| PICU admission weight                                                                                   | Chen, 2016 <sup>6</sup><br>Choi, 2017 <sup>7</sup><br>Diaz, 2017 <sup>9</sup><br>Li, 2016 <sup>26</sup><br>Abulebda, 2014 <sup>1</sup><br>Bhaskar, 2015 <sup>41</sup><br>Arikan, 2012 <sup>2</sup><br>Askenazi, 2013 <sup>3</sup><br>Boschee, 2014 <sup>5</sup><br>de Galasso, 2016 <sup>8</sup><br>Flores, 2008 <sup>11</sup><br>Gillespie, 2004 <sup>14</sup><br>Goldstein, 2001 <sup>16</sup><br>Goldstein, 2005 <sup>15</sup><br>Gulla, 2015 <sup>17</sup><br>Jhang, 2014 <sup>22</sup><br>Ketharanathan, 2014 <sup>24</sup><br>Lombel, 2012 <sup>27</sup><br>Modem, 2014 <sup>29</sup><br>Selewski, 2011 <sup>35</sup><br>Sutherland, 2010 <sup>38</sup><br>Sutawan, 2016 <sup>43</sup> |
| Hospital admission weight                                                                               | Hayes, 2009 <sup>19</sup><br>Lombel, 2012 <sup>27</sup><br>Michael, 2004 <sup>28</sup><br>Selewski, 2011 <sup>35</sup><br>Selewski, 2012 <sup>36</sup><br>Baird, 2010 <sup>4</sup><br>Sinitsky, 2015 <sup>37</sup>                                                                                                                                                                                                                                                                                                                                                                                                                                                                           |
| Hospital admission weight or the most recent available PICU weight                                      | Lex, 2016 <sup>25</sup>                                                                                                                                                                                                                                                                                                                                                                                                                                                                                                                                                                                                                                                                      |
| The lowest patient weight from either hospital admission or the most recent within 1 month of admission | Foland, 2004 <sup>13</sup>                                                                                                                                                                                                                                                                                                                                                                                                                                                                                                                                                                                                                                                                   |
| PICU dry or ideal bodyweight *                                                                          | Lombel, 2012 <sup>27</sup><br>Randolph, 2005 <sup>32</sup>                                                                                                                                                                                                                                                                                                                                                                                                                                                                                                                                                                                                                                   |
| Outpatient weight                                                                                       | Hazle, 2013 <sup>20</sup><br>Lombel, 2012 <sup>27</sup>                                                                                                                                                                                                                                                                                                                                                                                                                                                                                                                                                                                                                                      |
| Not specified                                                                                           | Elbahlawan, 2010 <sup>10</sup><br>Flori, 2011 <sup>12</sup><br>Hassinger, 2014 <sup>18</sup><br>Hoover, 2008 <sup>42</sup><br>Ingelse, 2017 <sup>21</sup><br>Kaempfen, 2017 <sup>23</sup><br>Naveda, 2016 <sup>30</sup><br>Park, 2016 <sup>31</sup><br>Sampaio, 2015 <sup>33</sup><br>Seguin, 2014 <sup>34</sup><br>Valentine, 2012 <sup>39</sup><br>Vidal, 2016 <sup>40</sup><br>Willson, 2013 <sup>44</sup>                                                                                                                                                                                                                                                                                |

\* Randolph et al used "ideal body weight": Estimated as the 50th percentile for recumbent length and sex from the National Center for Health Statistics growth charts.

\* Lombel et al used "PICU dry weight": assigned at the time of PICU admission by the PICU staff based on clinical judgment of pre-morbid weight



**eTable 6. Studies Reporting Respiratory Dysfunction and Outcomes**

| <b>Study</b>                      | <b>Population</b>             | <b>Main Respiratory Outcomes</b>                                                                                                                                                                                                                                                                                                                                                                                                                                                                                                                                                                                                               |
|-----------------------------------|-------------------------------|------------------------------------------------------------------------------------------------------------------------------------------------------------------------------------------------------------------------------------------------------------------------------------------------------------------------------------------------------------------------------------------------------------------------------------------------------------------------------------------------------------------------------------------------------------------------------------------------------------------------------------------------|
| Arikan, 2012 <sup>2</sup>         | Multisystem (ventilated only) | <ul style="list-style-type: none"> <li>• Peak %FO correlated significantly with peak OI (<math>r = 0.26</math>, <math>p &lt; 0.02</math>)</li> <li>• Higher peak %FO was an independent predictor of higher peak OI (<math>p = 0.009</math>) on multivariate regression analysis</li> <li>• Daily %FO &gt;15% was independently associated with that day's OI (regression coefficient= 0.12, <math>p = 0.004</math>)</li> <li>• %FO and OI regression coefficient progressively increased with increased %FO cut-off</li> <li>• %FO&gt;15% was independently associated with longer duration of MV (OR 0.46, <math>p = 0.01</math>)</li> </ul> |
| Bhaskar, 2015 <sup>41</sup>       | Sepsis/shock                  | <ul style="list-style-type: none"> <li>• MV was longer in patients with FO (median 2 vs 6 days, <math>p = 0.004</math>). However, the difference was not significant in matched analysis (5 vs 6 days, <math>p = 0.36</math>)</li> </ul>                                                                                                                                                                                                                                                                                                                                                                                                       |
| Elbahlawan, 2010 <sup>10</sup>    | Stem cell transplant on CRRT  | <ul style="list-style-type: none"> <li>• Improvement of PaO<sub>2</sub>/FiO<sub>2</sub> correlated significantly with reduction of fluid balance after initiation of CRRT (median PaO<sub>2</sub>/FiO<sub>2</sub> increase of 30.51 after 24 hours, and 43 after 48 hours, <math>p &lt; 0.05</math>)</li> </ul>                                                                                                                                                                                                                                                                                                                                |
| Flori, 2011 <sup>12</sup>         | ALI                           | <ul style="list-style-type: none"> <li>• Positive fluid balance (in 10 mL/kg/day increments) was independently associated with fewer ventilator-free days (regression coefficient = - 0.21, <math>p = 0.02</math>)</li> </ul>                                                                                                                                                                                                                                                                                                                                                                                                                  |
| Hassinger, 2014 <sup>18</sup>     | Post cardiac surgery          | <ul style="list-style-type: none"> <li>• Early FO was associated with prolonged MV (43% vs 8.8%). However, the association was not significant after adjusting for severity of illness (OR 3.15, <math>p = 0.18</math>)</li> </ul>                                                                                                                                                                                                                                                                                                                                                                                                             |
| Hayes, 2009 <sup>19</sup>         | CRRT                          | <ul style="list-style-type: none"> <li>• Higher %FO was associated with longer MV (median 7 vs 16 days, <math>p = 0.02</math>). The association was not significant on multivariable regression.</li> </ul>                                                                                                                                                                                                                                                                                                                                                                                                                                    |
| Ketharanathan, 2014 <sup>24</sup> | Multisystem                   | <ul style="list-style-type: none"> <li>• %FO correlated significantly with OI (<math>r = 0.33</math>, <math>p = 0.01</math>) and length of MV (<math>r = 0.34</math>, <math>p &lt; 0.001</math>)</li> </ul>                                                                                                                                                                                                                                                                                                                                                                                                                                    |
| Lex, 2016 <sup>25</sup>           | Post cardiac surgery          | <ul style="list-style-type: none"> <li>• Higher %FO was independently associated with prolonged MV (OR 1.01, <math>p = 0.03</math>)</li> </ul>                                                                                                                                                                                                                                                                                                                                                                                                                                                                                                 |
| Li, 2016 <sup>26</sup>            | Multisystem                   | <ul style="list-style-type: none"> <li>• There was a trend towards prolonged MV in the early FO group but it was not significant statistically (26.6% vs 17%, <math>p = 0.07</math>)</li> </ul>                                                                                                                                                                                                                                                                                                                                                                                                                                                |
| Sampaio, 2015 <sup>33</sup>       | Post cardiac surgery          | <ul style="list-style-type: none"> <li>• %FO was independently associated with Length of MV in multiple linear regression (<math>p &lt; 0.01</math>)</li> <li>• Peak %FO correlated significantly with maximum OI (Spearman's test = 0.37, <math>p = 0.01</math>)</li> <li>• Peak %FO was associated with chest wall edema (<math>p = 0.003</math>) and pleural effusion (<math>p = 0.01</math>)</li> <li>• Peak %FO was not associated with extubation failure (<math>p = 0.98</math>)</li> </ul>                                                                                                                                             |
| Seguin, 2014 <sup>34</sup>        | Post cardiac Surgery          | <ul style="list-style-type: none"> <li>• Peak %FO correlated significantly with maximum OI (<math>r = 0.32</math>, <math>p = 0.001</math>)</li> <li>• Higher FO % was independently associated with worse OI (HR 0.16, <math>p = 0.03</math>)</li> <li>• %FO at day 2 was independently associated with length of mechanical ventilation (HR 0.97, <math>p = 0.03</math>)</li> </ul>                                                                                                                                                                                                                                                           |

| Study                         | Population                    | Main Respiratory Outcomes                                                                                                                                                                                                                                                                                                                                                                                                 |
|-------------------------------|-------------------------------|---------------------------------------------------------------------------------------------------------------------------------------------------------------------------------------------------------------------------------------------------------------------------------------------------------------------------------------------------------------------------------------------------------------------------|
| Sinitsky, 2015 <sup>37</sup>  | Multisystem                   | <ul style="list-style-type: none"> <li>• %FO correlated significantly with oxygenation index (Spearman's test = 0.32, p &lt; 0.001) and with length of MV (Spearman's test = 0.27; p &lt; 0.001)</li> <li>• %FO was independently associated with OI at 48 hours (regression coefficient 0.26, p &lt; 0.001)</li> <li>• %FO was independently associated with MV days (regression coefficient 0.14, p = 0.002)</li> </ul> |
| Valentine, 2012 <sup>39</sup> | ALI                           | <ul style="list-style-type: none"> <li>• Higher fluid balance (mL/kg/day) at day 3 was independently associated with fewer ventilator-free days (regression coefficient = -0.02, p = 0.01)</li> </ul>                                                                                                                                                                                                                     |
| Willson, 2013 <sup>44</sup>   | ALI                           | <ul style="list-style-type: none"> <li>• Higher fluid balance (L/m<sup>2</sup>) was associated with fewer ventilation-free days (p &lt; 0.001)</li> <li>• Fluid balance (L/m<sup>2</sup>) was independently associated with OI (regression coefficient 0.52, p = 0.01)</li> </ul>                                                                                                                                         |
| Randolph, 2005 <sup>32</sup>  | Multisystem (ventilated only) | <ul style="list-style-type: none"> <li>• Higher fluid balance (ml/kg/day) was associated with nonsignificant trend towards longer duration of ventilation weaning (HR 0.94, P = 0.051)</li> <li>• Positive fluid balance did not predict extubation failure</li> </ul>                                                                                                                                                    |
| Chen, 2016 <sup>6</sup>       | Sepsis                        | <ul style="list-style-type: none"> <li>• Early FO was an independent predictor for the need of MV (OR 1.2, p = 0.04)</li> <li>• However, FO was not associated with the duration of MV (p = 0.3)</li> </ul>                                                                                                                                                                                                               |
| Diaz, 2017 <sup>9</sup>       | Multisystem                   | <ul style="list-style-type: none"> <li>• Peak %FO correlated with length of MV (r = 0.67, p &lt; 0.01)</li> </ul>                                                                                                                                                                                                                                                                                                         |
| Ingelse, 2017 <sup>21</sup>   | Multisystem (ventilated only) | <ul style="list-style-type: none"> <li>• Fluid balance (mL/kg/day) on day 3 was independently associated with duration of MV (p = 0.048), but not with OI</li> </ul>                                                                                                                                                                                                                                                      |
| Vidal, 2016 <sup>40</sup>     | Multisystem (ventilated only) | <ul style="list-style-type: none"> <li>• FO was associated with prolonged MV (OR 4.02, p = 0.04). However, the association was not significant after adjusting for severity of illness (OR 3.7, p = 0.06)</li> </ul>                                                                                                                                                                                                      |

OI = Oxygenation index  
 MV = Mechanical ventilation  
 ALI = Acute lung injury  
 OR = Odds ratio  
 HR = Hazard ratio

**eTable 7.** Other Outcomes From Individual Studies

| <b>Study</b>                  | <b>Outcome</b>                                                                                                                                         | <b>Result</b>                                                                                                                                                                                                                                                             |
|-------------------------------|--------------------------------------------------------------------------------------------------------------------------------------------------------|---------------------------------------------------------------------------------------------------------------------------------------------------------------------------------------------------------------------------------------------------------------------------|
| Abulebda, 2014 <sup>1</sup>   | Composite of “complicated course”: death within the 28-day study period or persistence of >2 organ failures at day-7 post admission.                   | <ul style="list-style-type: none"> <li>Those with complicated course had higher %FO (8.5% Vs 3.8%, P &lt;0.001)</li> </ul>                                                                                                                                                |
| Bhaskar, 2015 <sup>41</sup>   | ECMO use                                                                                                                                               | <ul style="list-style-type: none"> <li>FO group had more ECMO use compared to no FO (OR 6.2, P=0.01)</li> </ul>                                                                                                                                                           |
| Hassinger, 2014 <sup>18</sup> | Hemodynamic variables                                                                                                                                  | <p>In FO group:</p> <ul style="list-style-type: none"> <li>Later first inotrope-free day (day 5 Vs day 3, P &lt;0.001)</li> <li>Higher peak inotropic score (P &lt;0.01)</li> <li>More likely to have escalation in inotropic support (20% vs 4.4%) (p = 0.01)</li> </ul> |
| Hazle, 2013 <sup>20</sup>     | Composite of poor outcome: need for CRRT, upper quartile time to first extubation or intensive care length of stay, or death within 30 days of surgery | <ul style="list-style-type: none"> <li>Maximum %FO was higher in patients who developed “poor outcome” (24% vs 14%, p=0.02)</li> </ul>                                                                                                                                    |
| Lex, 2016 <sup>25</sup>       | Post cardiac bypass low cardiac output syndrome                                                                                                        | <ul style="list-style-type: none"> <li>Cumulative %FO on day of surgery was independently associated with low cardiac output syndrome (OR 1.21, P= 0.002)</li> </ul>                                                                                                      |

**eFigure 1.** Flow Diagram of the Study Selection Process

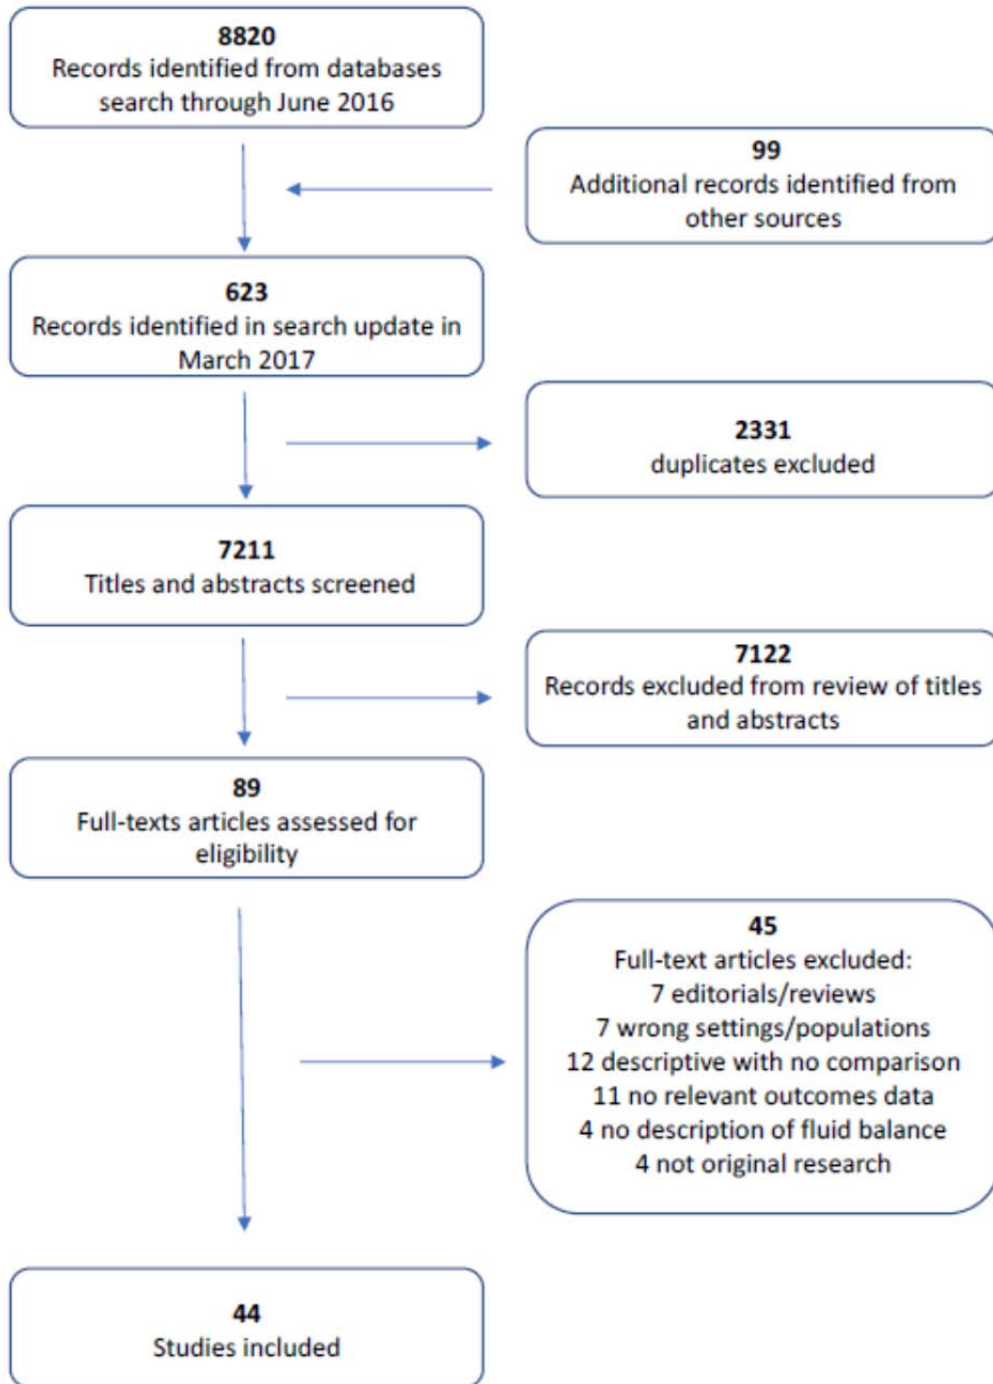

**eFigure 2.** Association Between FO (Categorical Exposure) and Mortality in Studies Adjusting for Severity of Illness

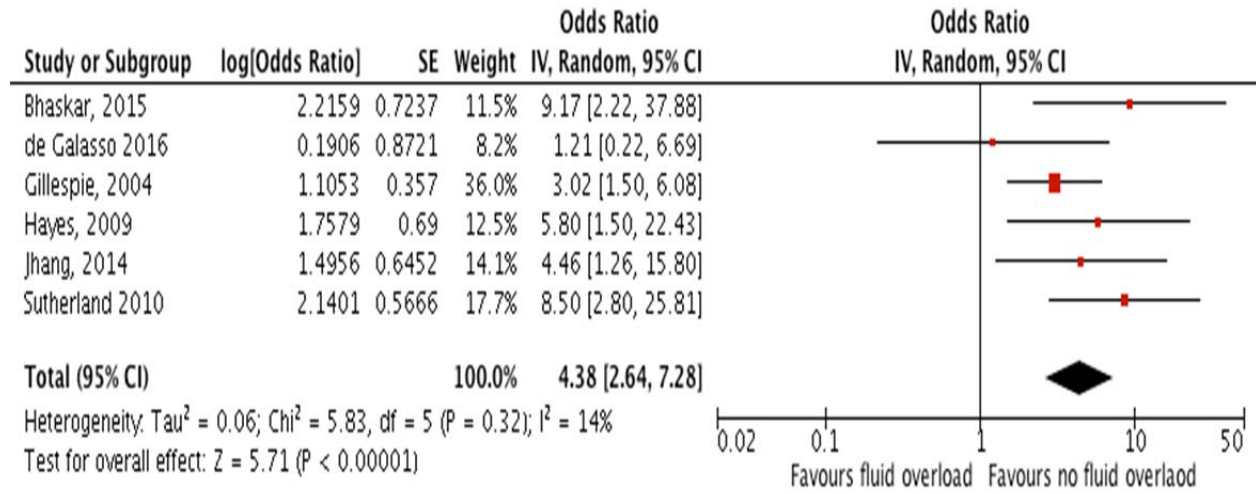

Studies adjusted for:

- Bhaskar, 2015: PIM 2, age, indication for ICU admission, duration of hospitalization prior to ICU transfer, presence of infectious diagnoses, presence of oncologic disease(s), presence of respiratory failure, need for vasopressor support and presence of renal dysfunction.
- De Galasso, 2016: PIM2, diagnosis, MODS at CRRT initiation, hypotension at CRRT initiation
- Gillespie, 2004: PRISM2, dose of CVVH replacement of fluid, number of inotropes
- Hayes, 2009: PRISM 2, age, race, sex
- Jhang, 2014: SOFA score
- Sutherland, 2010: PRISM, MODS, CRRT modality, number of inotropes

**eFigure 3.** Association Between Fluid Overload (Categorical Exposure) and Mortality Omitting Studies of Children Receiving CRRT

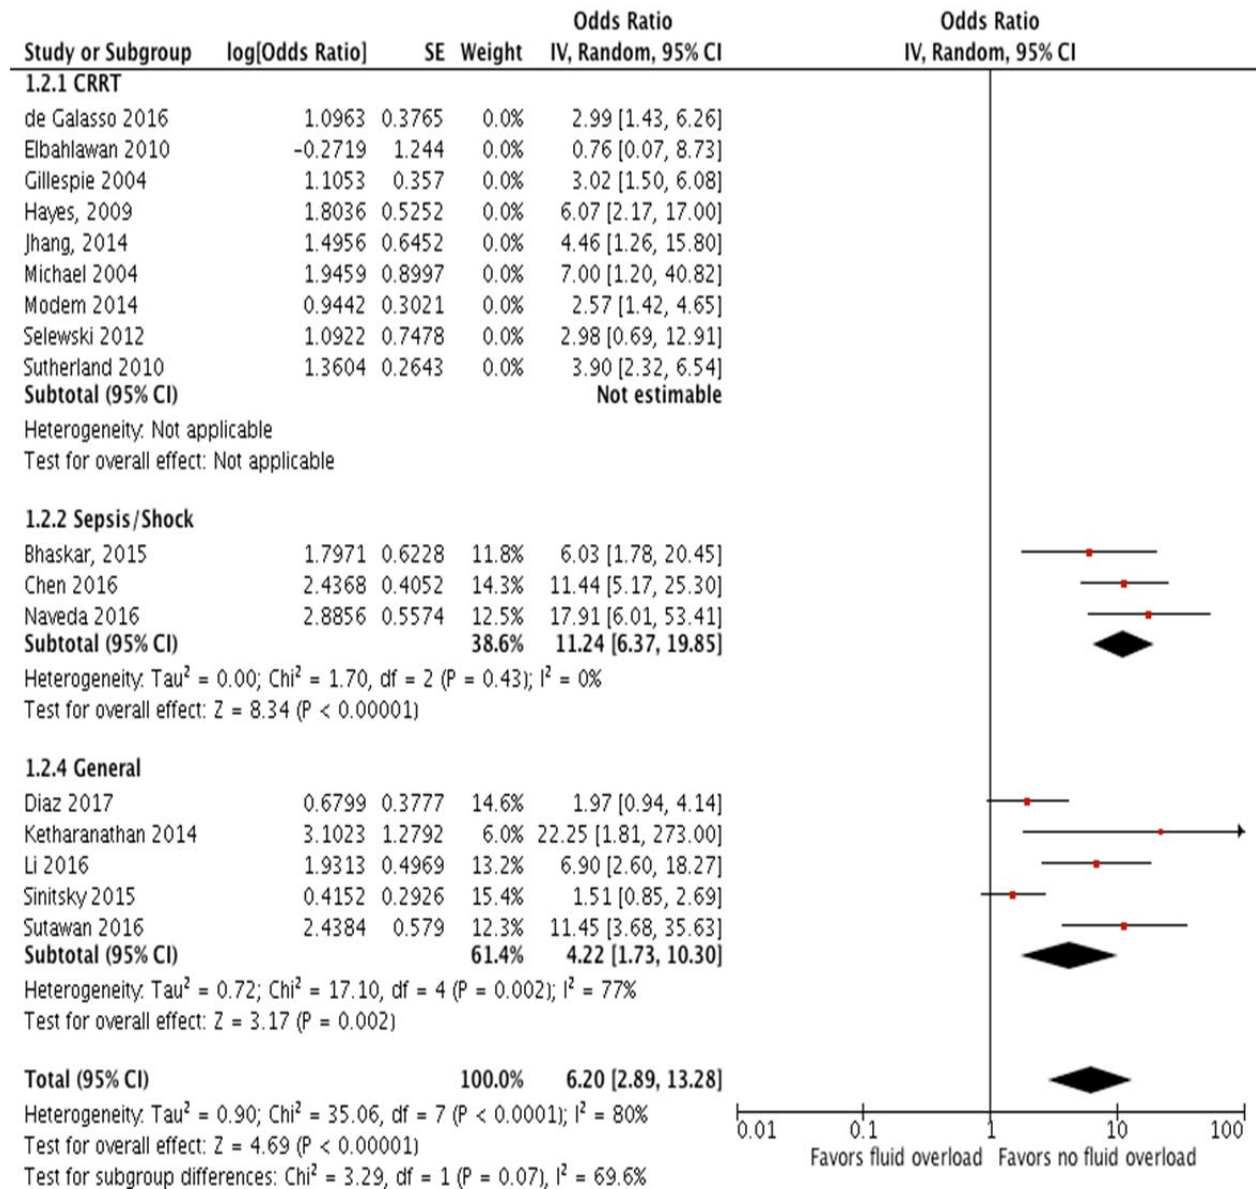

## Association between fluid overload (continuous exposure) and mortality omitting studies of children receiving CRRT

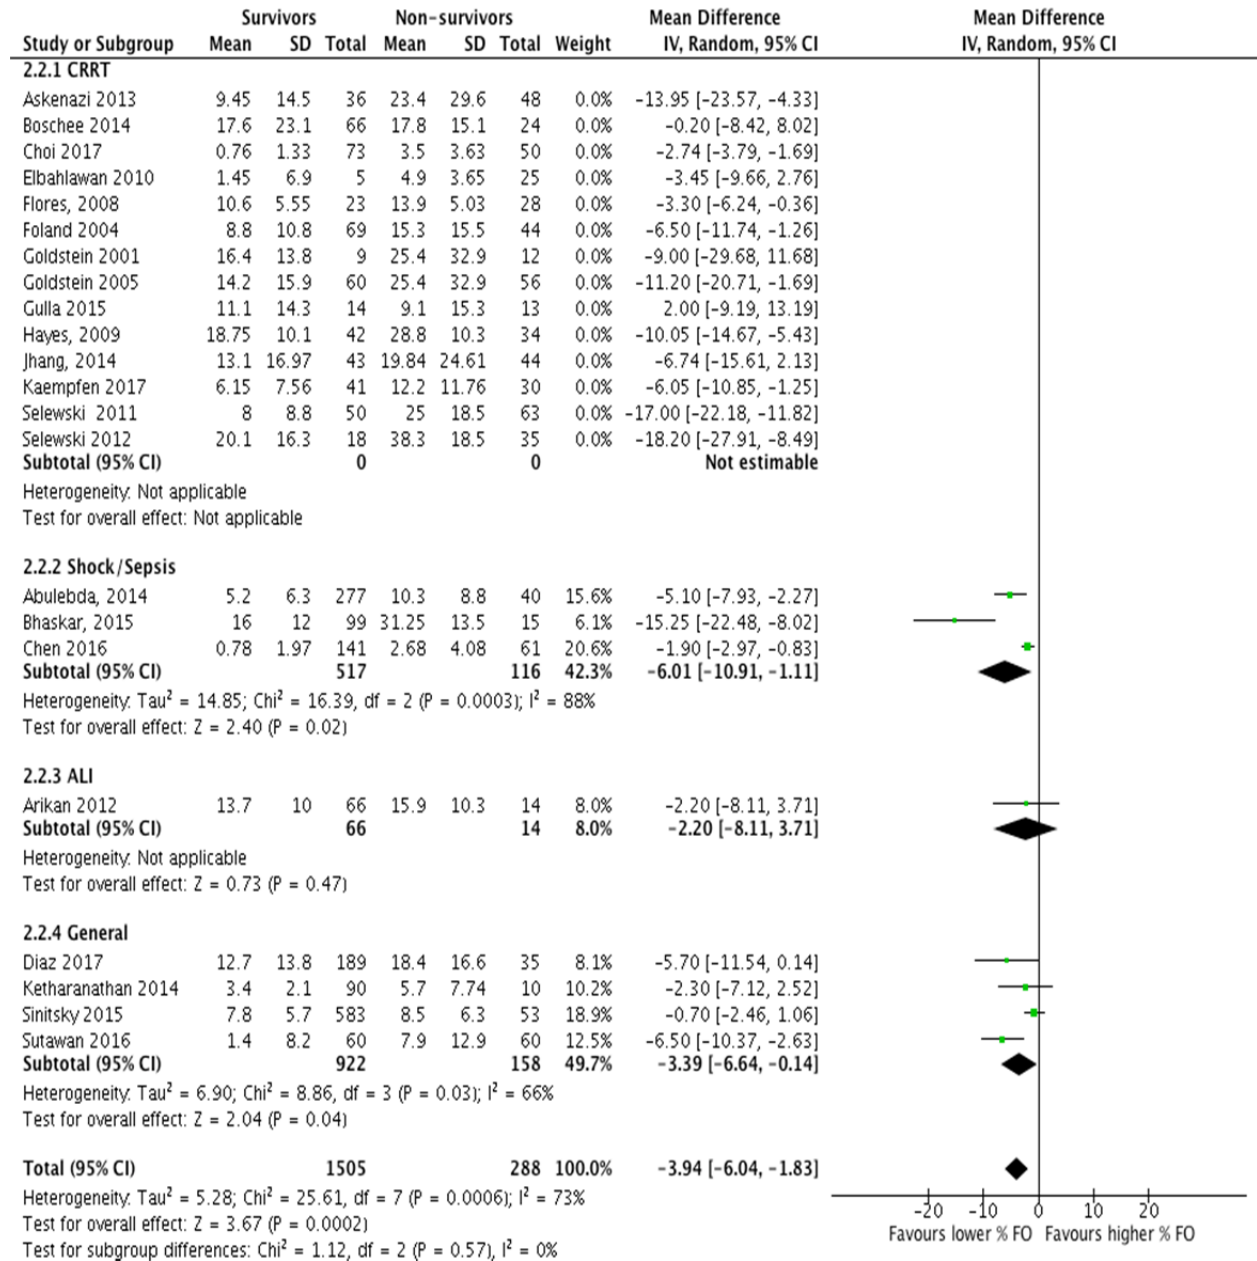

**eFigure 4** Percent Fluid Overload (%FO) (Continuous Variable) Association With Mortality, Stratified by Assessment Period

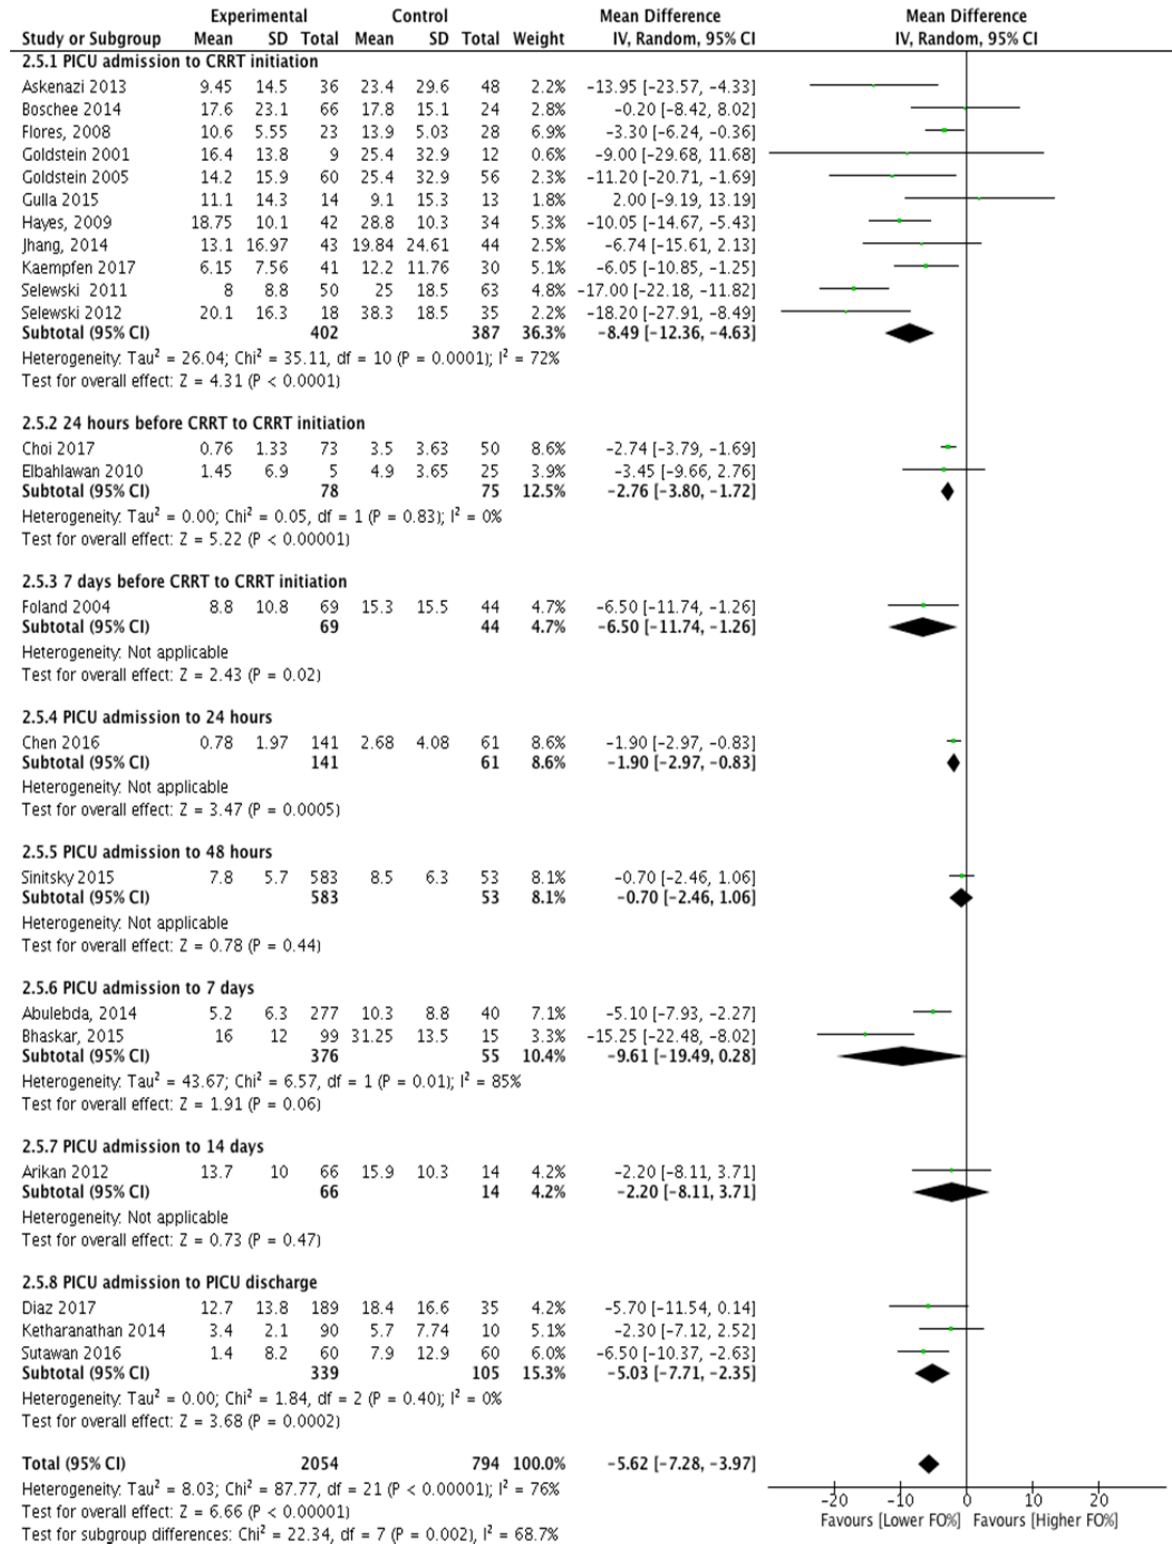



**eFigure 5.** Percent Fluid Overload (%FO) (Continuous Variable) Association With Mortality in Studies Adjusting for Severity of Illness (Stratified by Case-Mix)

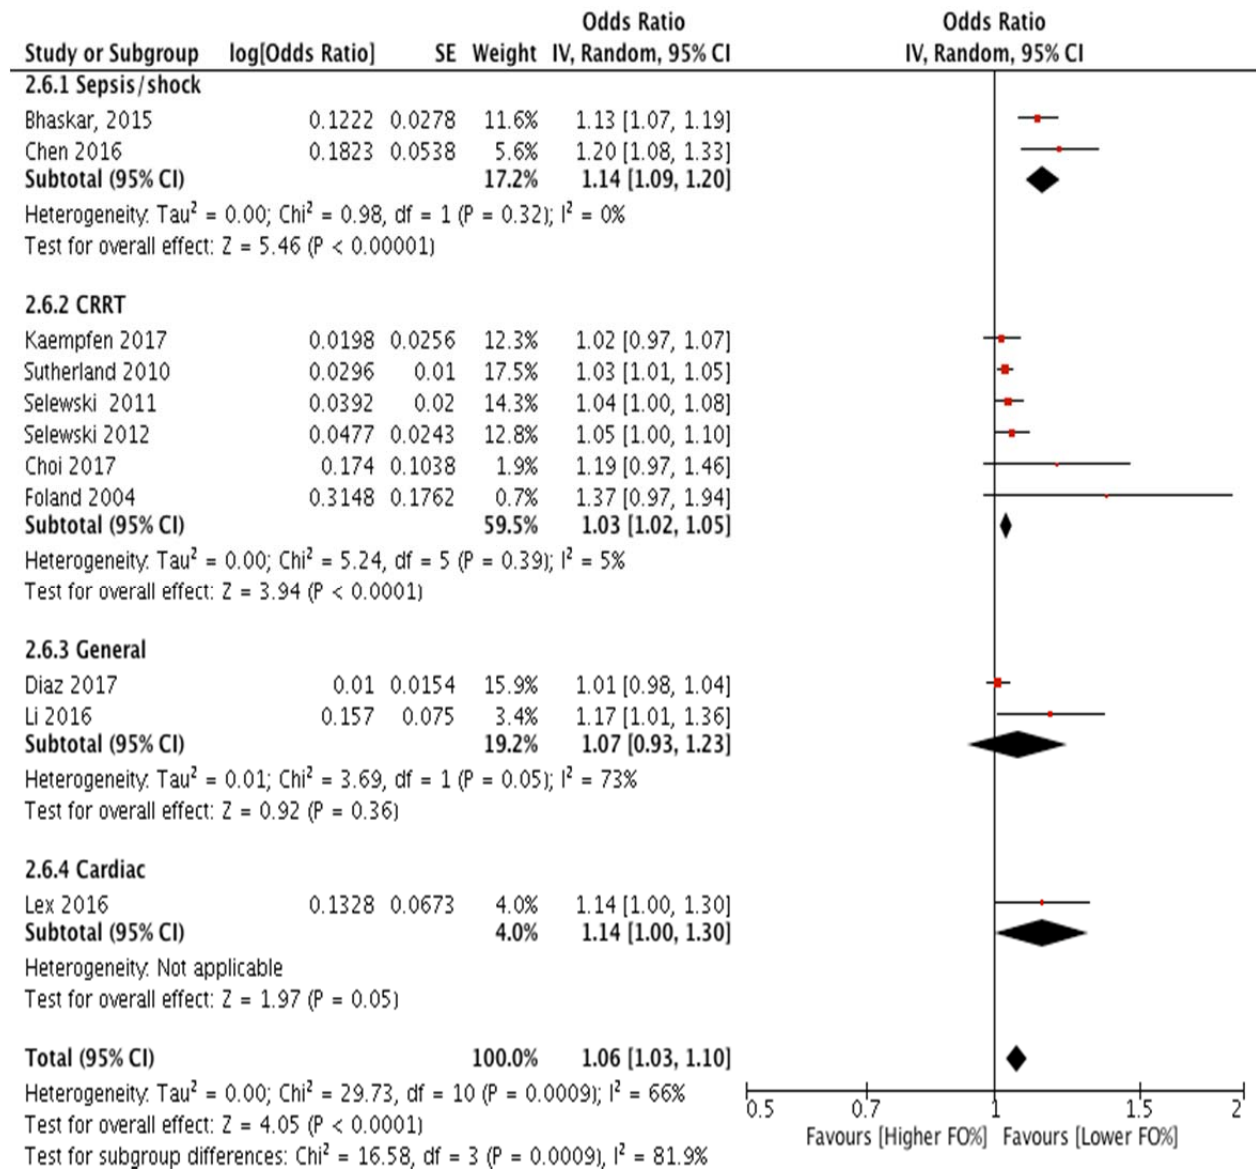

Studies adjusted for:

- Bhaskar, 2015: PIM 2, age, indication for ICU admission, duration of hospitalization prior to ICU transfer, presence of infectious diagnoses, presence of oncologic disease(s), presence of respiratory failure, need for vasopressor support and presence of renal dysfunction.
- Chen, 2016: PIM2, age
- Kaempfen, 2017: Weight, length of stay prior to CRRT, inotrope need, mean blood pressure prior to CRRT
- Sutherland, 2010: PRISM, MODS, CRRT modality, number of inotropes
- Selewski, 2011: Age, hospital days pre CRRT, extracorporeal life support status, pRIFLE status, and number of vasoactive agents
- Selewski, 2012: Age, PRISM
- Choi, 2017: PRISM III, inotrope score, length of PICU stay, length of stay prior to CRRT, duration of CRRT, lactic acid, Creatinine, Urea
- Foland, 2004: PRISM III
- Diaz, 2017: PRISM II, age, AKI status, vasoactive support, >3 organ failure
- Li, 2016: PRISM III, age, need for mechanical ventilation, AKI
- Lex, 2016: age, emergency operation, cardiac bypass time, CRRT, low cardiac output syndrome

**eFigure 6.** Funnel Plot of FO Odds of Mortality (Categorical Exposure) Analysis

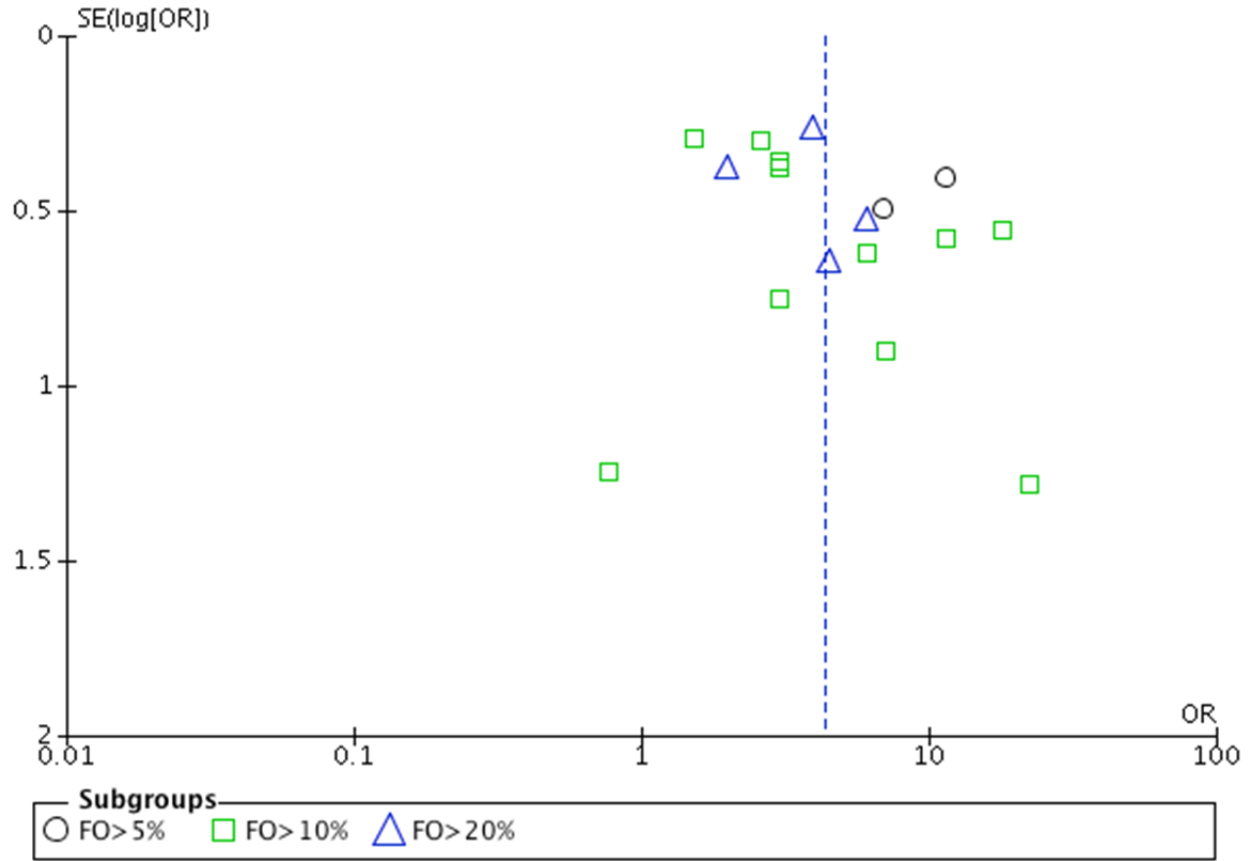

**eFigure 7.** Funnel Plot of Fluid Overload Percent (%FO) (Continuous Variable) Association With Mortality Analysis

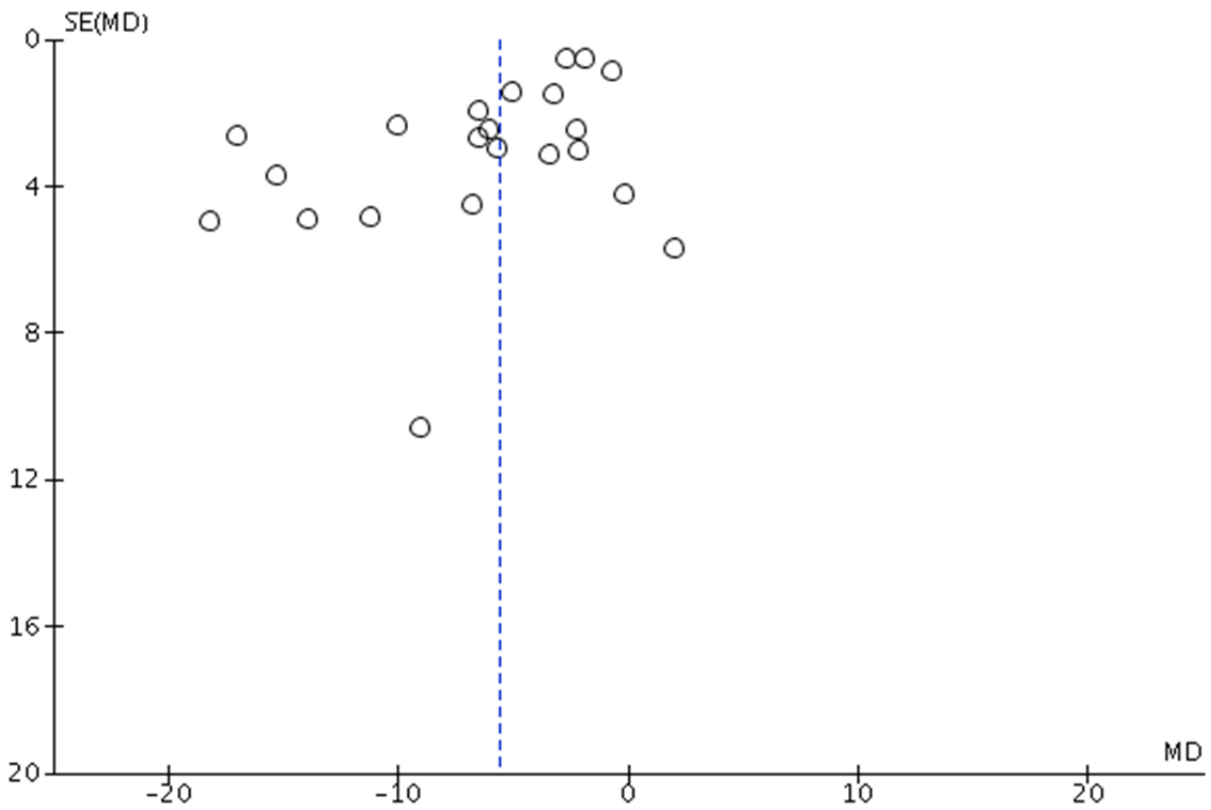

**eFigure 8.** Random-Effects Meta-analysis of FO and Prolonged Mechanical Ventilation

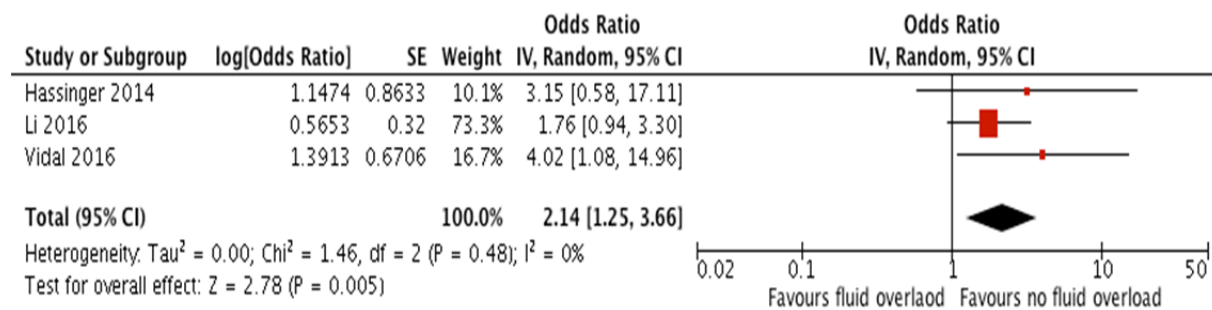

**eFigure 9.** Random-Effects Meta-analysis of FO and Acute Kidney Injury

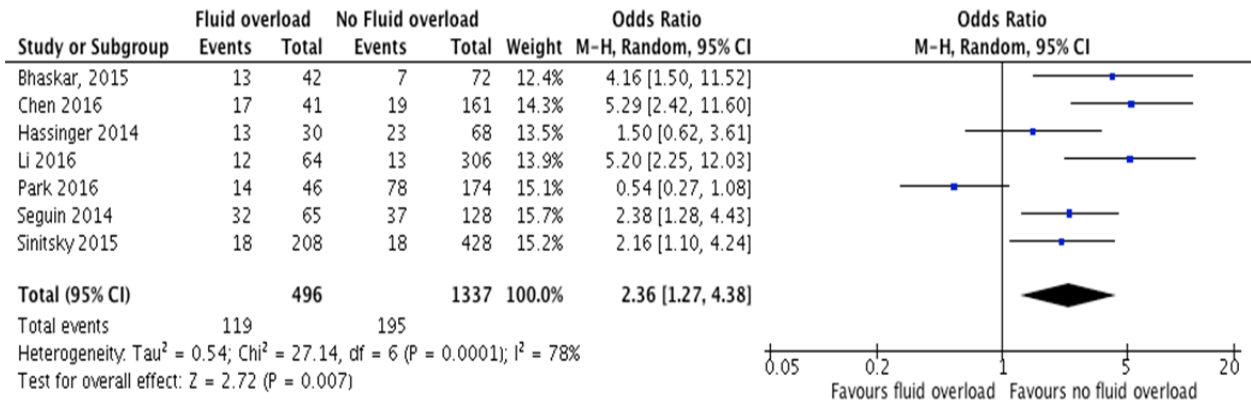

**eFigure 10.** Random-Effects Meta-analysis of FO and PICU Length of Stay

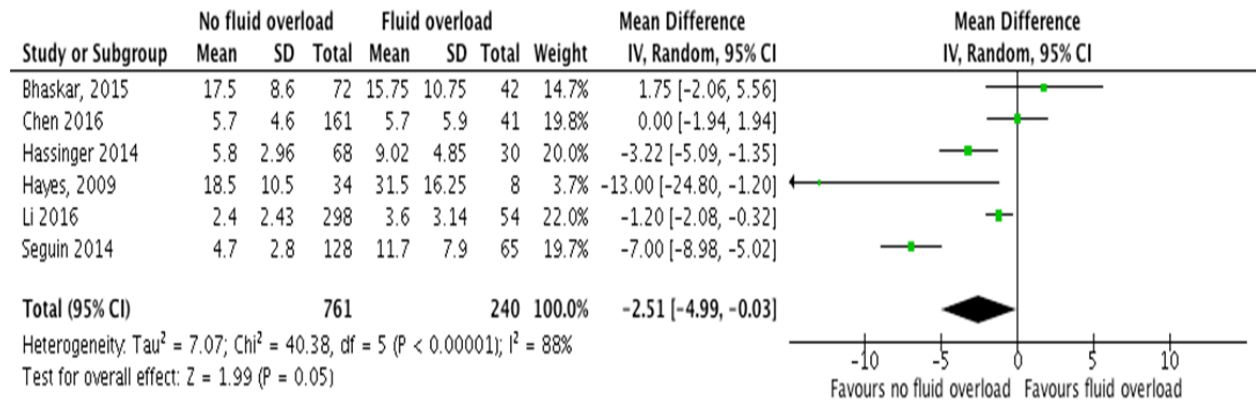

References:

1. Abulebda K, Cvijanovich NZ, Thomas NJ, et al. Post-ICU admission fluid balance and pediatric septic shock outcomes: a risk-stratified analysis. *Crit Care Med*. 2014;42(2):397-403.
2. Arikan AA, Zappitelli M, Goldstein SL, Naipaul A, Jefferson LS, Loftis LL. Fluid overload is associated with impaired oxygenation and morbidity in critically ill children. *Pediatr Crit Care Med*. 2012;13(3):253-258.
3. Askenazi DJ, Goldstein SL, Koralkar R, et al. Continuous renal replacement therapy for children <10 kg: a report from the prospective pediatric continuous renal replacement therapy registry. *J Pediatr*. 2013;162(3):587-592.e583.
4. Baird JS, Wald EL. Long-duration (>4 weeks) continuous renal replacement therapy in critical illness. *Int J Artif Organs*. 2010;33(10):716-720.
5. Boschee ED, Cave DA, Garros D, et al. Indications and outcomes in children receiving renal replacement therapy in pediatric intensive care. *J Crit Care*. 2014;29(1):37-42.
6. Chen J, Li X, Bai Z, et al. Association of Fluid Accumulation with Clinical Outcomes in Critically Ill Children with Severe Sepsis. *PLoS ONE*. 2016;11(7):e0160093.
7. Choi SJ, Ha EJ, Jhang WK, Park SJ. Factors Associated With Mortality in Continuous Renal Replacement Therapy for Pediatric Patients With Acute Kidney Injury. *Pediatr Crit Care Med*. 2017;18(2):e56-e61.
8. de Galasso L, Emma F, Picca S, Di Nardo M, Rossetti E, Guzzo I. Continuous renal replacement therapy in children: fluid overload does not always predict mortality. *Pediatr Nephrol*. 2016;31(4):651-659.
9. Diaz F, Benfield M, Brown L, Hayes L. Fluid overload and outcomes in critically ill children: A single center prospective cohort study. *J Crit Care*. 2017;39:209-213.

10. Elbahlawan L, West NK, Avent Y, et al. Impact of continuous renal replacement therapy on oxygenation in children with acute lung injury after allogeneic hematopoietic stem cell transplantation. *Pediatr Blood Cancer*. 2010;55(3):540-545.
11. Flores FX, Brophy PD, Symons JM, et al. Continuous renal replacement therapy (CRRT) after stem cell transplantation. A report from the prospective pediatric CRRT Registry Group. *Pediatr Nephrol*. 2008;23(4):625-630.
12. Flori HR, Church G, Liu KD, Gildengorin G, Matthay MA. Positive fluid balance is associated with higher mortality and prolonged mechanical ventilation in pediatric patients with acute lung injury. *Crit Care Res Pract*. 2011;2011:854142.
13. Foland JA, Fortenberry JD, Warshaw BL, et al. Fluid overload before continuous hemofiltration and survival in critically ill children: a retrospective analysis. *Crit Care Med*. 2004;32(8):1771-1776.
14. Gillespie RS, Seidel K, Symons JM. Effect of fluid overload and dose of replacement fluid on survival in hemofiltration. *Pediatr Nephrol*. 2004;19(12):1394-1399.
15. Goldstein SL, Somers MJ, Baum MA, et al. Pediatric patients with multi-organ dysfunction syndrome receiving continuous renal replacement therapy. *Kidney Int*. 2005;67(2):653-658.
16. Goldstein SL, Currier H, Graf C, Cosio CC, Brewer ED, Sachdeva R. Outcome in children receiving continuous venovenous hemofiltration. *Pediatrics*. 2001;107(6):1309-1312.
17. Gulla KM, Sachdev A, Gupta D, Gupta N, Anand K, Pruthi PK. Continuous renal replacement therapy in children with severe sepsis and multiorgan dysfunction - A pilot study on timing of initiation. *Indian Journal of Critical Care Medicine*. 2015;19(10):613-617.



18. Hassinger AB, Wald EL, Goodman DM. Early postoperative fluid overload precedes acute kidney injury and is associated with higher morbidity in pediatric cardiac surgery patients. *Pediatr Crit Care Med*. 2014;15(2):131-138.
19. Hayes LW, Oster RA, Tofil NM, Tolwani AJ. Outcomes of critically ill children requiring continuous renal replacement therapy. *J Crit Care*. 2009;24(3):394-400.
20. Hazle MA, Gajarski RJ, Yu S, Donohue J, Blatt NB. Fluid overload in infants following congenital heart surgery. *Pediatr Crit Care Med*. 2013;14(1):44-49.
21. Ingelse SA, Wiegers HM, Calis JC, van Woensel JB, Bem RA. Early Fluid Overload Prolongs Mechanical Ventilation in Children With Viral-Lower Respiratory Tract Disease. *Pediatr Crit Care Med*. 2017;18(3):e106-e111.
22. Jhang WK, Kim YA, Ha EJ, et al. Extrarenal sequential organ failure assessment score as an outcome predictor of critically ill children on continuous renal replacement therapy. *Pediatr Nephrol*. 2014;29(6):1089-1095.
23. Kaempfen S, Dutta-Kukreja P, Mok Q. Continuous Venovenous Hemofiltration in Children Less Than or Equal to 10 kg: A Single-Center Experience. *Pediatr Crit Care Med*. 2017;18(2):e70-e76.
24. Ketharanathan N, McCulloch M, Wilson C, et al. Fluid overload in a South African pediatric intensive care unit. *J Trop Pediatr*. 2014;60(6):428-433.
25. Lex DJ, Toth R, Czobor NR, et al. Fluid Overload Is Associated With Higher Mortality and Morbidity in Pediatric Patients Undergoing Cardiac Surgery. *Pediatr Crit Care Med*. 2016;17(4):307-314.
26. Li Y, Wang J, Bai Z, et al. Early fluid overload is associated with acute kidney injury and PICU mortality in critically ill children. *Eur J Pediatr*. 2016;175(1):39-48.

27. Lombel RM, Kommareddi M, Mottes T, et al. Implications of different fluid overload definitions in pediatric stem cell transplant patients requiring continuous renal replacement therapy. *Intensive Care Med.* 2012;38(4):663-669.
28. Michael M, Kuehnle I, Goldstein SL. Fluid overload and acute renal failure in pediatric stem cell transplant patients. *Pediatr Nephrol.* 2004;19(1):91-95.
29. Modem V, Thompson M, Gollhofer D, Dhar AV, Quigley R. Timing of continuous renal replacement therapy and mortality in critically ill children. *Crit Care Med.* 2014;42(4):943-953.
30. Naveda OE, Naveda AF. Positive fluid balance and high mortality in paediatric patients with severe sepsis and septic shock. *Pediatrics.* 2016;49(3):71-77.
31. Park SK, Hur M, Kim E, et al. Risk Factors for Acute Kidney Injury after Congenital Cardiac Surgery in Infants and Children: A Retrospective Observational Study. *PLoS ONE.* 2016;11(11):e0166328.
32. Randolph AG, Forbes PW, Gedeit RG, et al. Cumulative fluid intake minus output is not associated with ventilator weaning duration or extubation outcomes in children. *Pediatr Crit Care Med.* 2005;6(6):642-647+719-721.
33. Sampaio TZ, O'Hearn K, Reddy D, Menon K. The Influence of Fluid Overload on the Length of Mechanical Ventilation in Pediatric Congenital Heart Surgery. *Pediatr Cardiol.* 2015;36(8):1692-1699.
34. Seguin J, Albright B, Vertullo L, et al. Extent, risk factors, and outcome of fluid overload after pediatric heart surgery. *Crit Care Med.* 2014;42(12):2591-2599.
35. Selewski DT, Cornell TT, Lombel RM, et al. Weight-based determination of fluid overload status and mortality in pediatric intensive care unit patients requiring continuous renal replacement therapy. *Intensive Care Med.* 2011;37(7):1166-1173.

36. Selewski DT, Cornell TT, Blatt NB, et al. Fluid overload and fluid removal in pediatric patients on extracorporeal membrane oxygenation requiring continuous renal replacement therapy. *Crit Care Med*. 2012;40(9):2694-2699.
37. Sinitsky L, Walls D, Nadel S, Inwald DP. Fluid overload at 48 hours is associated with respiratory morbidity but not mortality in a general PICU: retrospective cohort study. *Pediatr Crit Care Med*. 2015;16(3):205-209.
38. Sutherland SM, Zappitelli M, Alexander SR, et al. Fluid overload and mortality in children receiving continuous renal replacement therapy: the prospective pediatric continuous renal replacement therapy registry. *Am J Kidney Dis*. 2010;55(2):316-325.
39. Valentine SL, Sapru A, Higginson RA, et al. Fluid balance in critically ill children with acute lung injury. *Crit Care Med*. 2012;40(10):2883-2889.
40. Vidal S, Perez A, Eulmesekian P. Fluid balance and length of mechanical ventilation in children admitted to a single Pediatric Intensive Care Unit. *Archivos Argentinos de Pediatría*. 2016;114(4):313-318.
41. Bhaskar P, Dhar AV, Thompson M, Quigley R, Modem V. Early fluid accumulation in children with shock and ICU mortality: a matched case-control study. *Intensive Care Med*. 2015;41(8):1445-1453.
42. Hoover NG, Heard M, Reid C, et al. Enhanced fluid management with continuous venovenous hemofiltration in pediatric respiratory failure patients receiving extracorporeal membrane oxygenation support. *Intensive Care Med*. 2008;34(12):2241-2247.
43. Sutawan IBR, Wati DK, Suparyatha IBG. Association of fluid overload with mortality in pediatric intensive care unit. *Critical Care and Shock*. 2016;19(1):8-13.

44. Willson DF, Thomas NJ, Tamburro R, et al. The relationship of fluid administration to outcome in the pediatric calfactant in acute respiratory distress syndrome trial. *Pediatr Crit Care Med.* 2013;14(7):666-672.
